# Supplementary material
Source: publisher figshare collection journal article supplement (https://tandf.figshare.com/ndownloader/files/17337797)
Supplement: Supplementary file 1 [file 17337797]

Supplementary Table 4. Effects of bentonite addition and *Z. mays* cultivation on residual PCBi concentrations (ng g-1) in the soil containing 1200 ng ƩPCBi g-1 after 10 weeks of incubation.

| PCBi | without plant cultivation | | | with maize cultivation | | |
| --- | --- | --- | --- | --- | --- | --- |
| **B0*(Control)** | **B2** | **B4** | **B0** | **B2** | **B4** |
| CB5 | 12.7a | 12.7a | 13.1a | 8.37b | 6.28c | 4.98d |
| CB18 | 15.1a | 13.3b | 14.4b | 11.03b | 8.93c | 6.80d |
| CB31 | 35.3a | 35.5a | 35.2a | 23.62b | 19.32c | 15.65d |
| CB44 | 21.5a | 21.7a | 21.5a | 16.58b | 11.43c | 6.62d |
| CB52 | 8.40a | 8.18a | 7.64a | 5.89b | 4.03c | 3.46c |
| CB66 | 41.2a | 40.8a | 41.1a | 28.89b | 15.19c | 13.36d |
| CB87 | 114.8a | 114.1a | 114.5a | 83.58b | 64.22c | 51.58d |
| CB101 | 20.3a | 20.1a | 20.2a | 10.05b | 6.11c | 3.76d |
| CB110 | 65.7a | 64.6a | 65.1a | 31.74b | 29.46b | 23.38c |
| CB138 | 57.5a | 57.5a | 56.6a | 32.52b | 21.92c | 18.49d |
| CB141 | 239.0a | 236.2a | 233.6a | 181.52b | 164.32c | 127.85d |
| CB151 | 49.3a | 45.4a | 46.8a | 23.23b | 14.92c | 11.28d |
| CB153 | 60.4a | 61.5a | 61.7a | 40.36b | 33.55c | 20.06d |
| CB170 | 62.7a | 61.4a | 62.4a | 26.92b | 19.29c | 14.62d |
| CB180 | 42.0a | 41.5a | 41.4a | 24.46b | 18.62c | 14.12d |
| CB183 | 150.4a | 153.5a | 149.2a | 110.25b | 102.9c | 85.66d |

Different letters in each row represent signiﬁcant differences with Tukey test (P< 0.05).

*: B0: 0% bentonite, B2: 2% bentonite, B4: 4% bentonite
